# Supplementary material for: Synthesis of a Di-Mycoloyl Tri-Arabinofuranosyl Glycerol Fragment of the Mycobacterial Cell Wall, Based on Synthetic Mycolic Acids
Source: PubMed Central journal article supplement (PMC6804083; doi:10.3390/molecules24193596), 2019-10-06
Supplement: molecules-24-03596-s001.pdf [file molecules-24-03596-s001.pdf]

Supporting Information

**Synthesis of di-mycoloyl tri-arabinofuranosyl glycerol fragment of mycobacterial cell wall based on synthetic mycolic acids**

Omar T. Ali, Mohsin O. Mohammed, Juma'a R. Al Dulayymi, Mark S. Baird

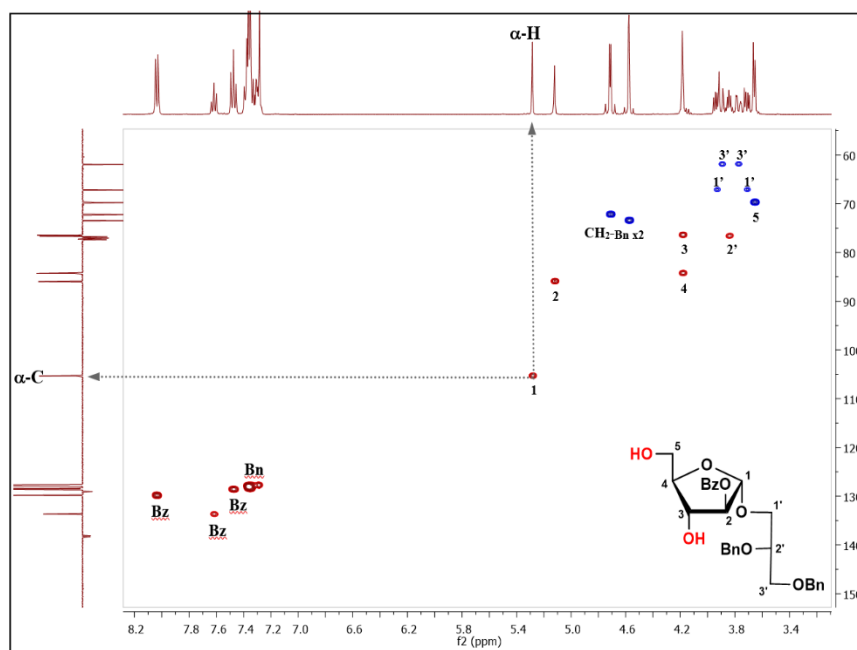

**Figure S0:** HSQC-NMR spectrum for TAG's acceptor (5).

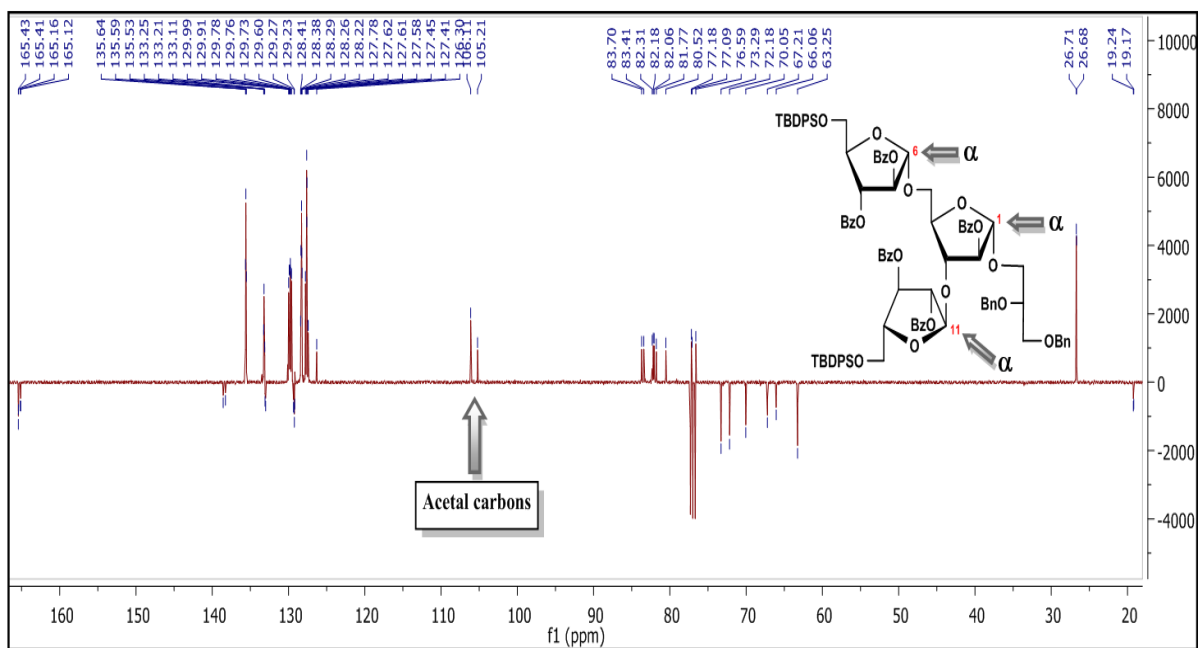

Figure S1:  $^{13}\text{C}$ -NMR spectrum for fully protected tri-arabino glycerol (**6**).

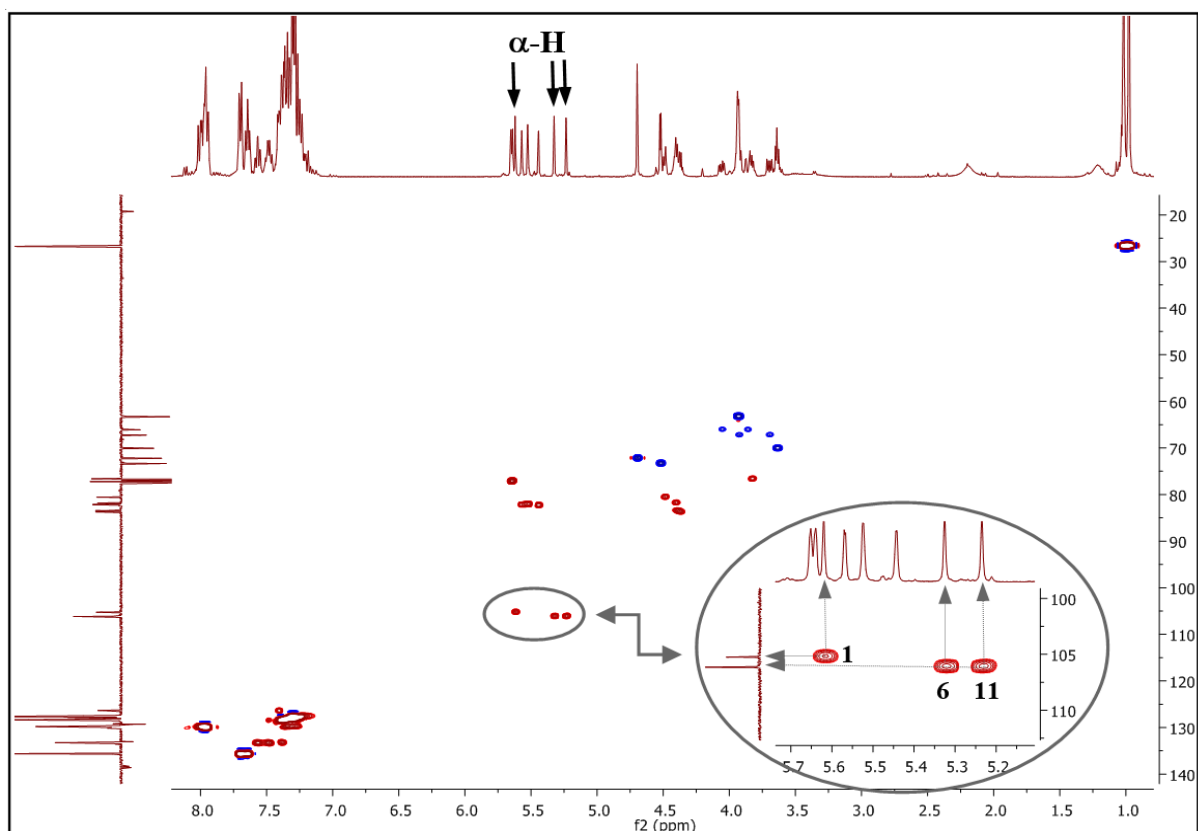

Figure S2: HSQC-NMR spectrum for tri-arabino glycerol (**6**).

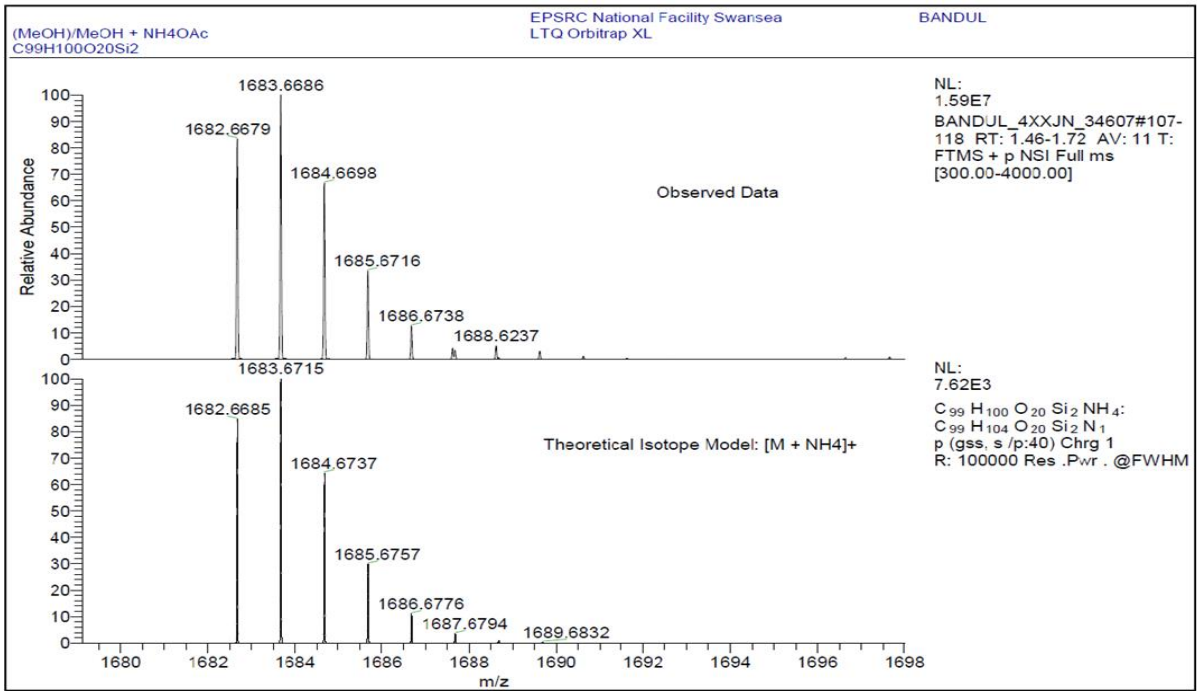

**Figure S3:** Mass spectrum of the tri-saccharide compound (6).

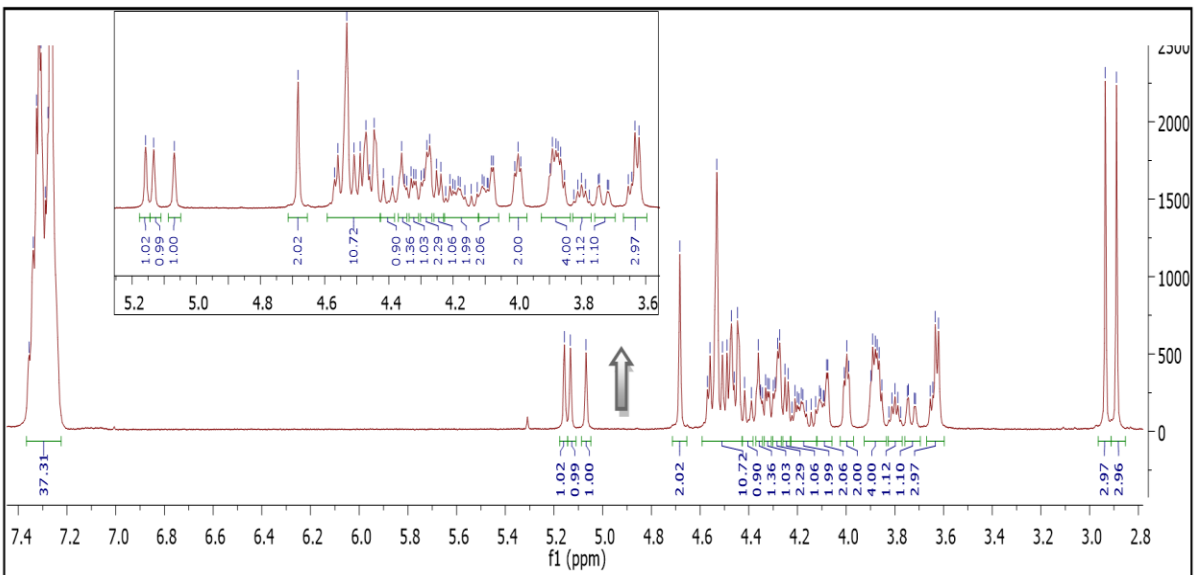

**Figure S4:** <sup>1</sup>H-NMR spectrum for compound (10).

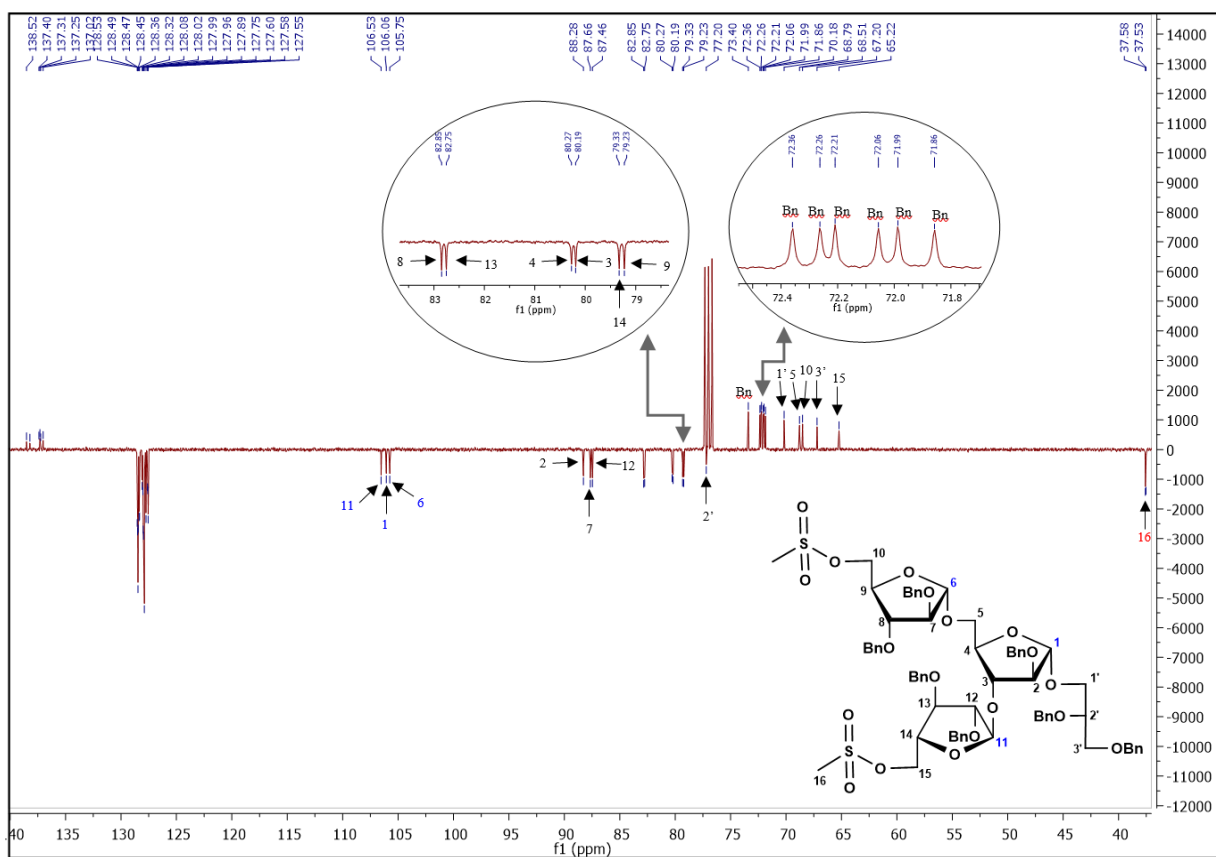

Figure S5:  $^{13}\text{C}$ -NMR spectrum for compound (10).

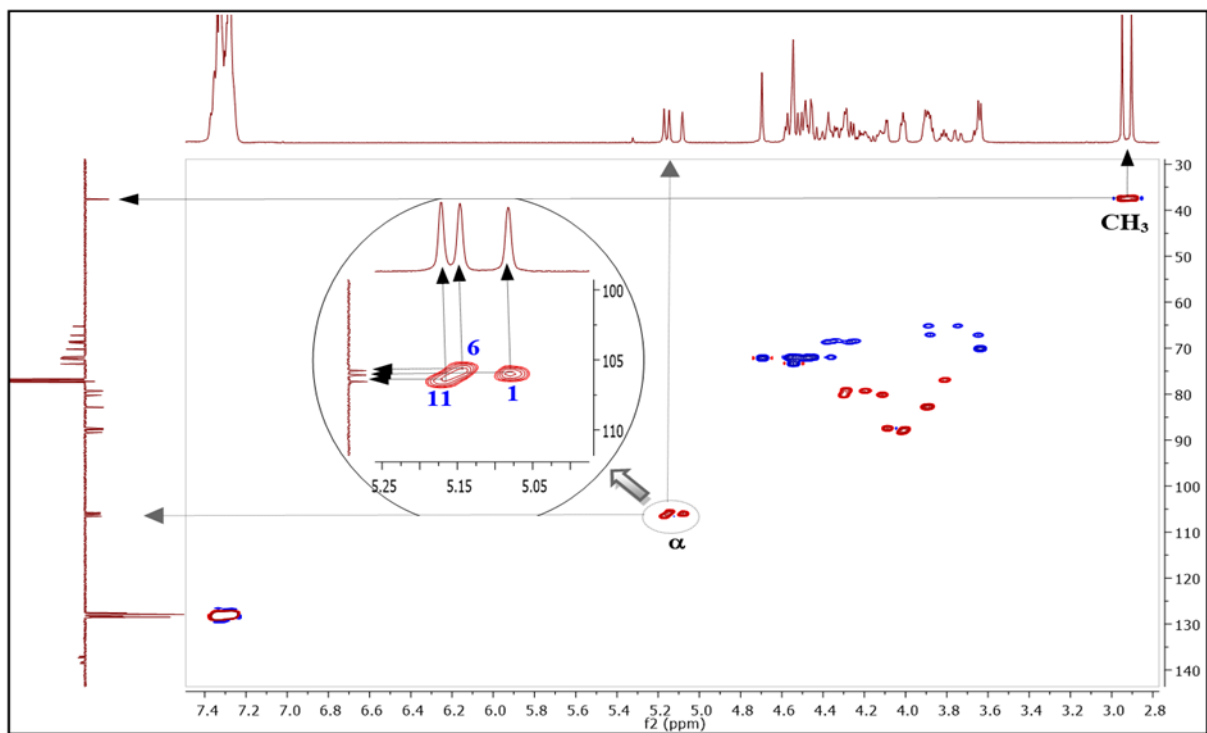

Figure S6: 2D-NMR spectrum for compound (10).

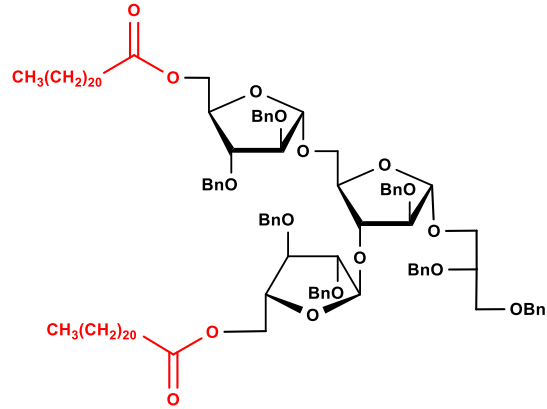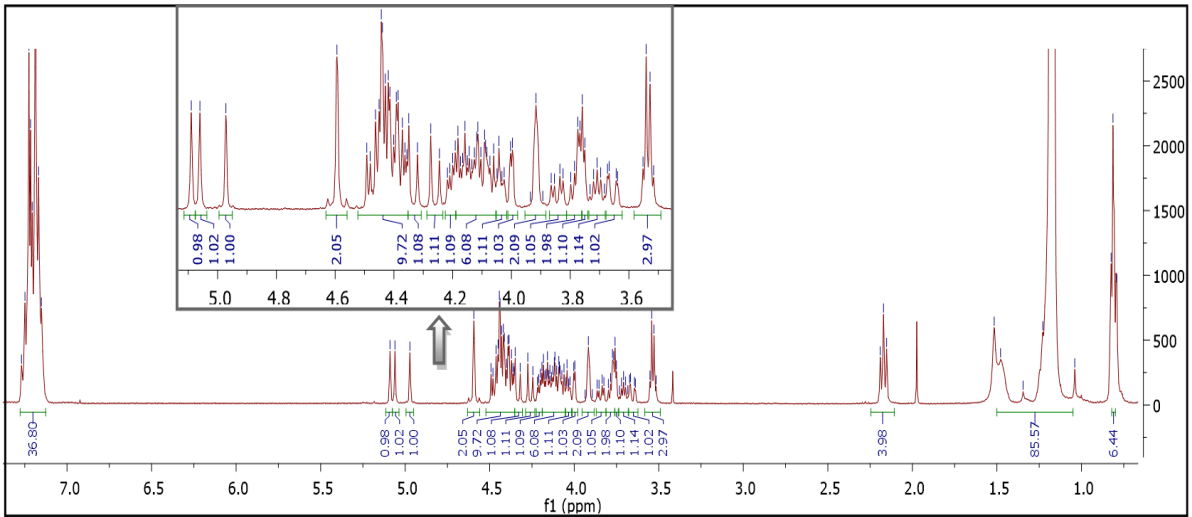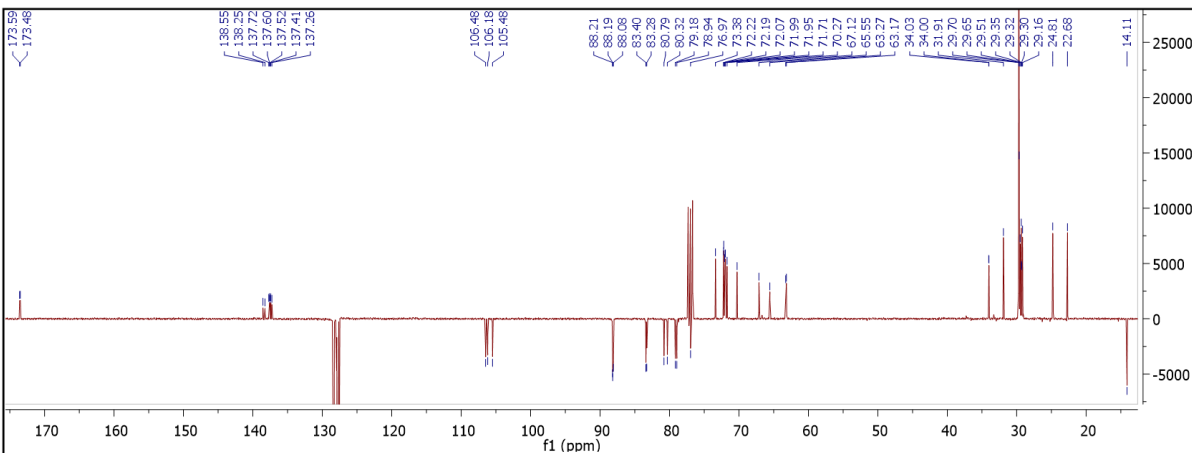

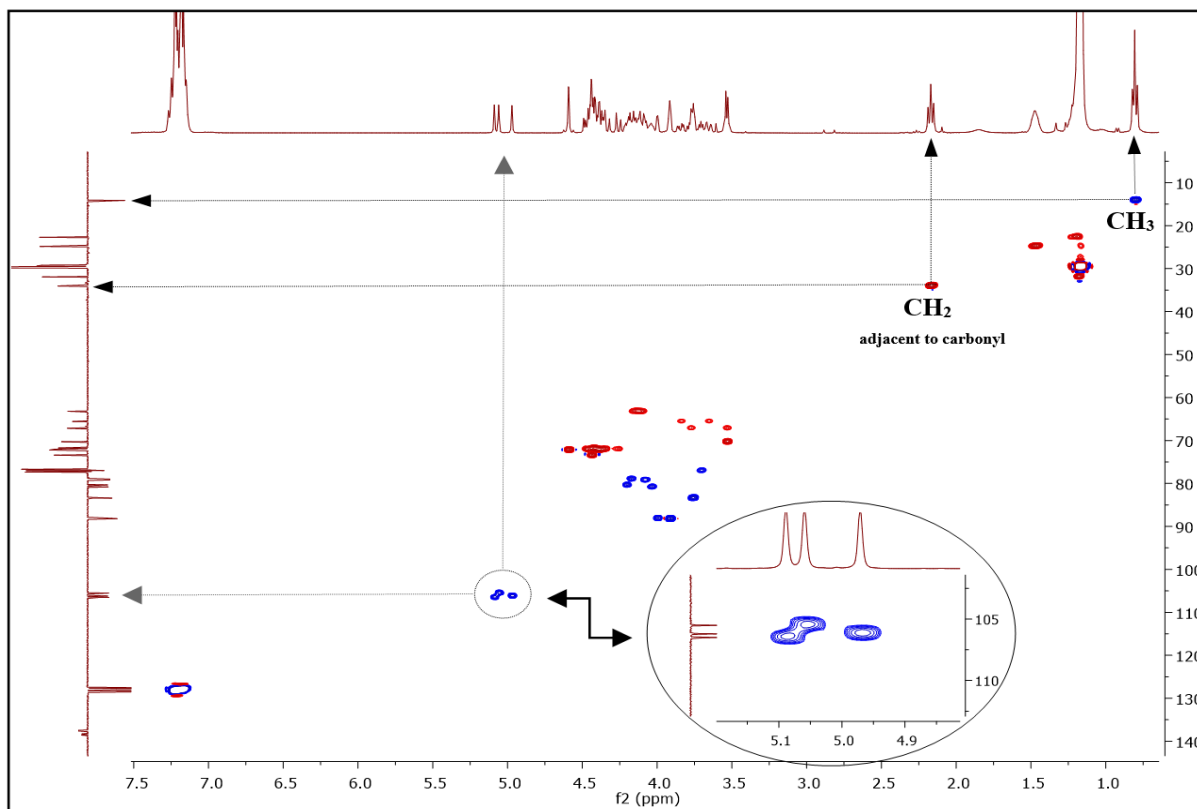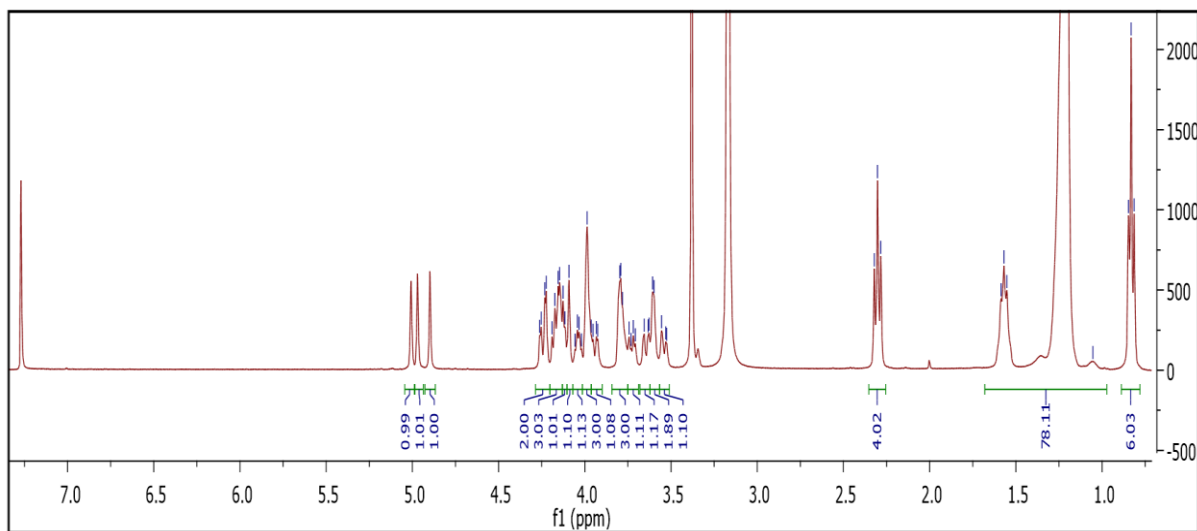

**Figure S7:**  $^1\text{H-NMR}$  spectrum for compound (**11**, R = H).

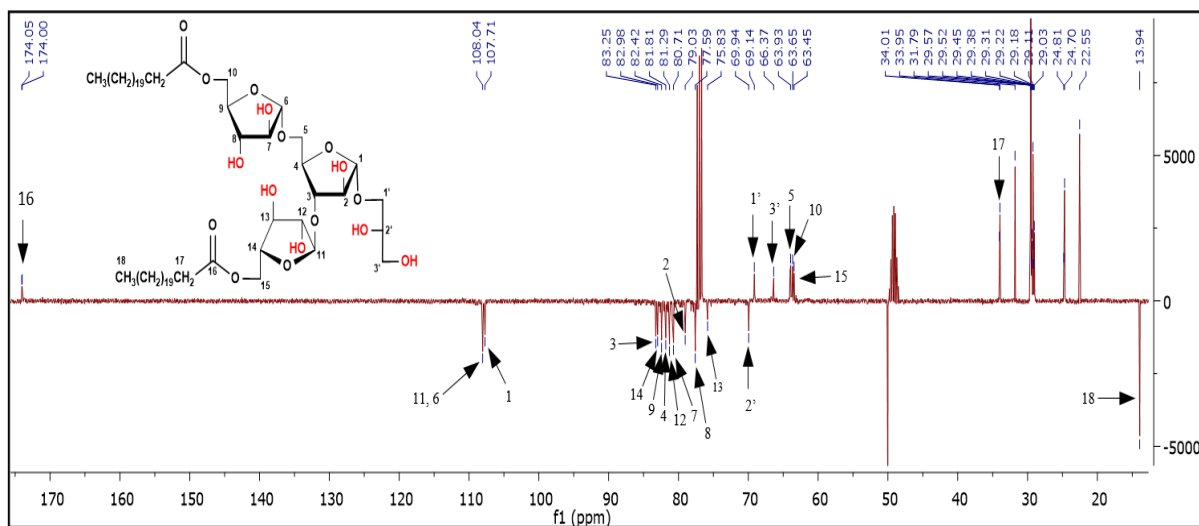

Figure S8:  $^{13}\text{C}$ -NMR spectrum for compound (**11**, R = H).

Table S1: The  $^1\text{H}$  and  $^{13}\text{C}$ -NMR data analysis of the glycolipid compound (**11**, R = H).

| Proton                            | Shift | H's | Class | J/Hz      | Carbon          | $\delta/\text{ppm}$ |
|-----------------------------------|-------|-----|-------|-----------|-----------------|---------------------|
| H <sub>11</sub>                   | 5.01  | 1   | br. s | -         | C <sub>16</sub> | 174.05              |
| H <sub>1</sub>                    | 4.90  | 1   | br. s | -         | C <sub>1</sub>  | 107.7               |
| H <sub>10, 3</sub>                | 4.24  | 2   | br.dd | 3.2, 11.7 | C <sub>3</sub>  | 83.3                |
| H <sub>15, 1'', 13</sub>          | 4.17  | 3   | br.dd | 5.0, 11.8 | C <sub>14</sub> | 83.0                |
| H <sub>15'</sub>                  | 4.12  | 1   | br.d  | 4.3       | C <sub>9</sub>  | 82.4                |
| H <sub>10'</sub>                  | 4.09  | 1   | m     | -         | C <sub>4</sub>  | 81.8                |
| H <sub>4</sub>                    | 4.04  | 1   | br.q  | 5.5       | C <sub>12</sub> | 81.3                |
| H <sub>2, 7, 9</sub>              | 3.95  | 3   | br.m  | -         | C <sub>7</sub>  | 80.7                |
| H <sub>5'</sub>                   | 3.94  | 1   | dd    | 3.6, 11.5 | C <sub>2</sub>  | 79.0                |
| H <sub>5, 2', 8</sub>             | 3.79  | 3   | m     | -         | C <sub>8</sub>  | 77.6                |
| H <sub>1'</sub>                   | 3.73  | 1   | br.dd | 4.8, 10.1 | C <sub>13</sub> | 75.8                |
| H <sub>3''</sub>                  | 3.64  | 1   | m     | -         | C <sub>2'</sub> | 69.9                |
| H <sub>3', 12</sub>               | 3.60  | 2   | br.d  | 3.1       | C <sub>1'</sub> | 69.1                |
| H <sub>14</sub>                   | 3.54  | 1   | m     | -         | C <sub>3'</sub> | 66.4                |
| CH <sub>2</sub> -Next to carbonyl | 2.30  | 4   | t     | 7.6       | C <sub>5</sub>  | 63.9                |
| CH <sub>2</sub> -Chain            | 1.39  | 83  | m     | -         | C <sub>10</sub> | 63.7                |
| CH <sub>3</sub> -Terminal         | 0.83  | 6   | t     | 6.5       | C <sub>15</sub> | 63.5                |
| -                                 | -     | -   | -     | -         | C <sub>17</sub> | 34.0                |
| -                                 | -     | -   | -     | -         | C <sub>18</sub> | 13.9                |

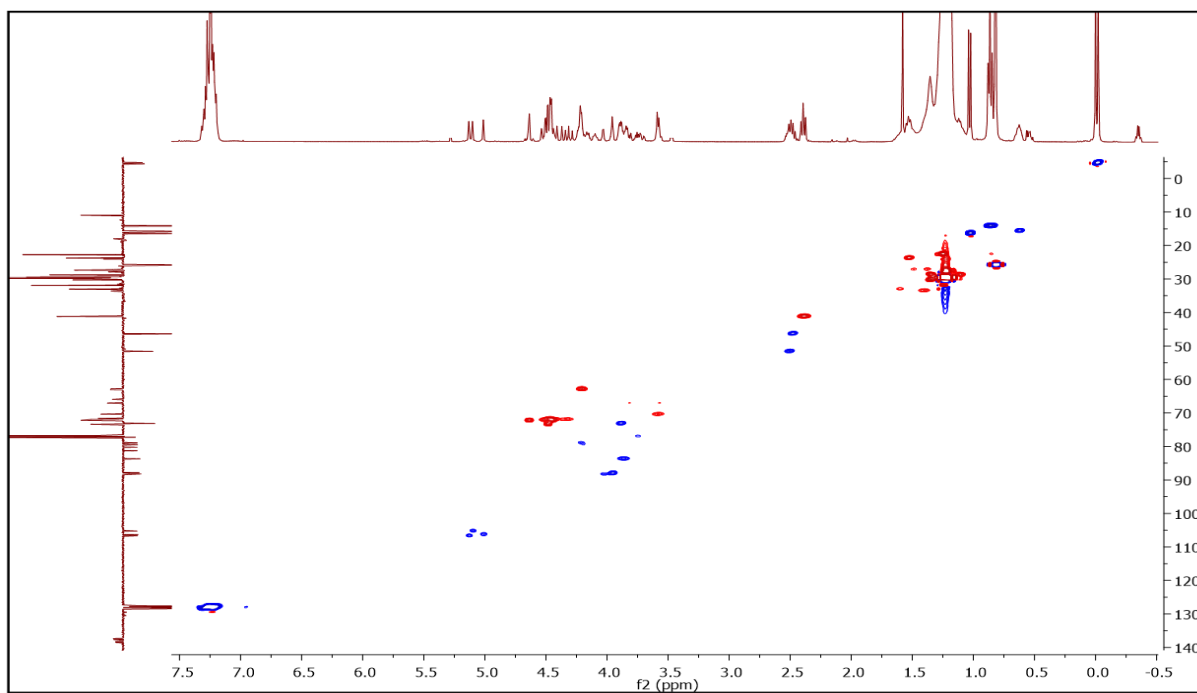

**Figure S9:** HSQC-NMR spectrum for compound (13a ( $R' = \text{TBDMS}$ )).

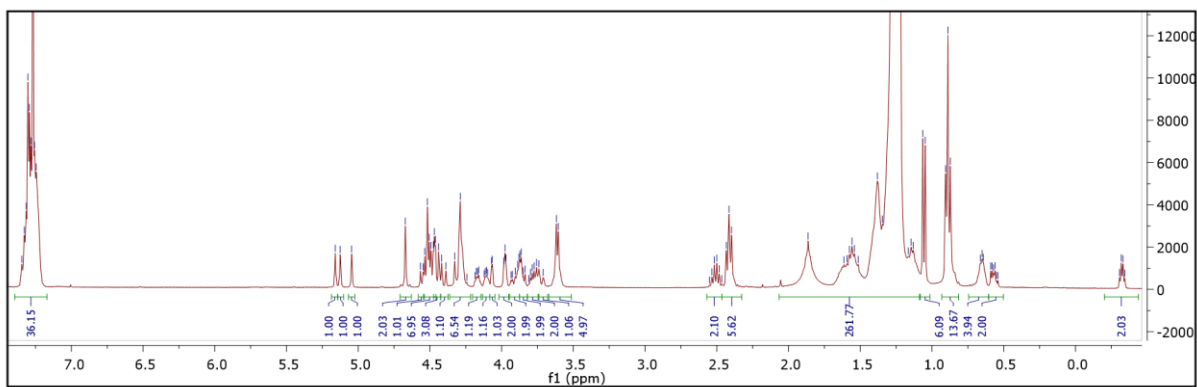

**Figure S10:**  $^1\text{H}$ -NMR spectrum for compound (14a ( $R' = \text{H}$ )).



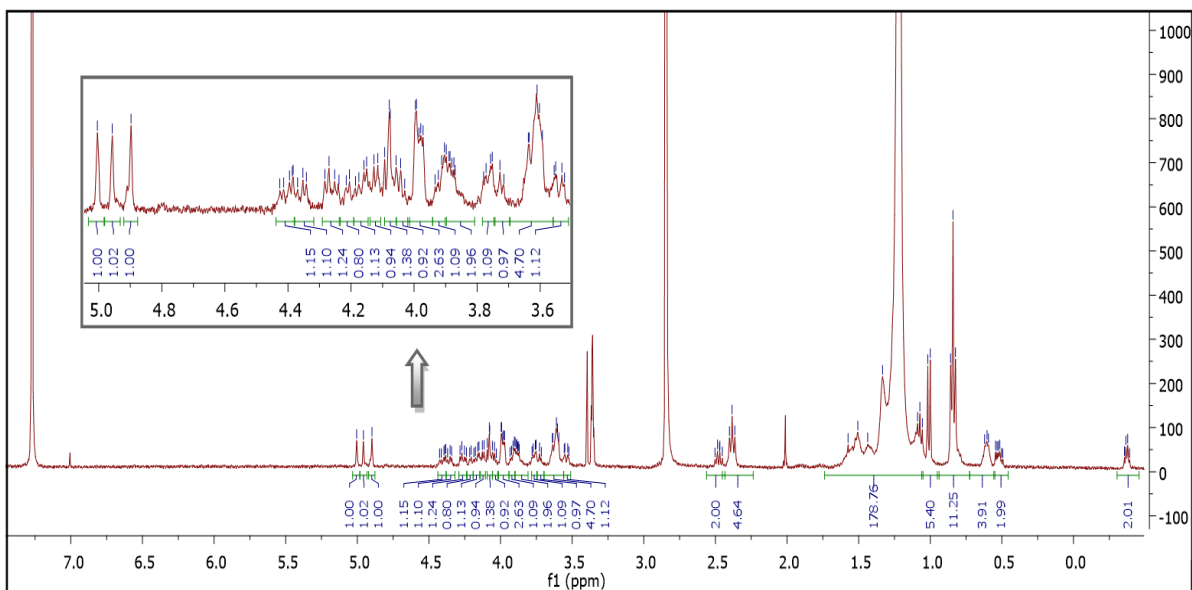

Figure S11: <sup>1</sup>H-NMR spectrum for compound (**15a** (R' = H)).

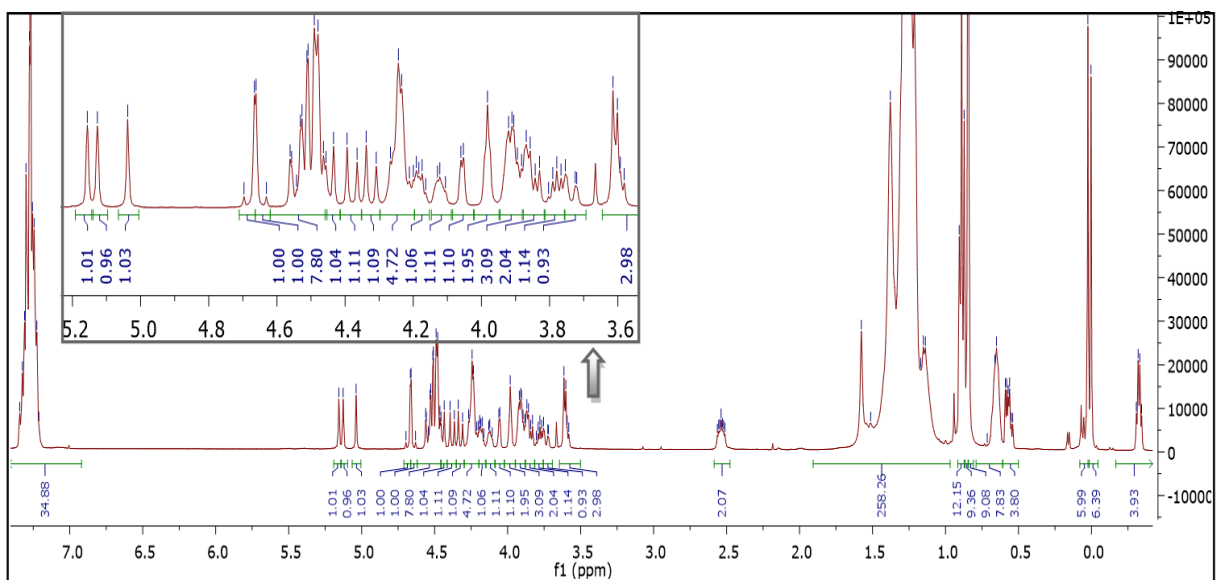

Figure S12: <sup>1</sup>H-NMR spectrum for compound (**13b** (R' = TBDMS)).

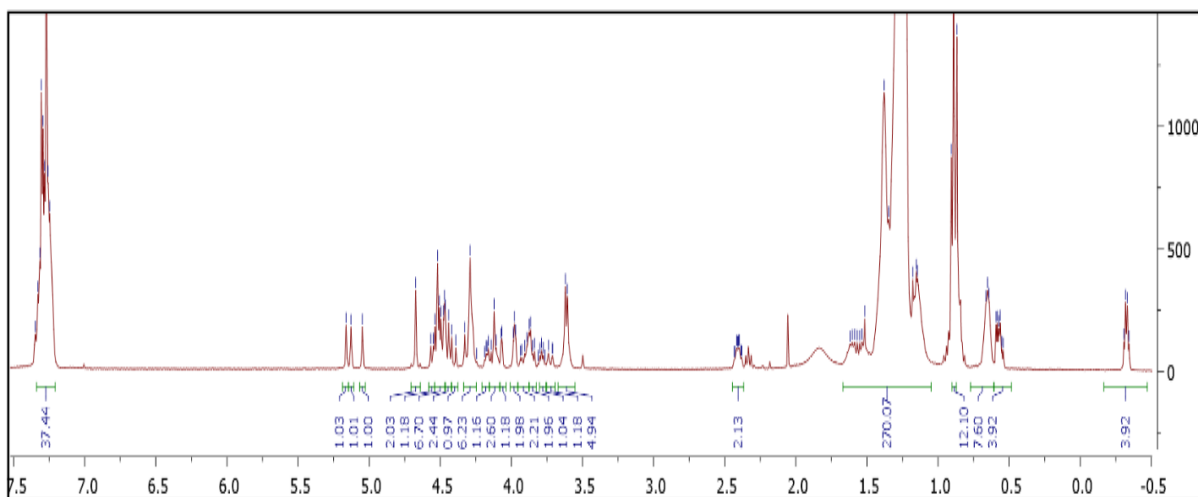

Figure S13:  $^1\text{H-NMR}$  spectrum for compound (**14b** ( $\text{R}' = \text{H}$ )).

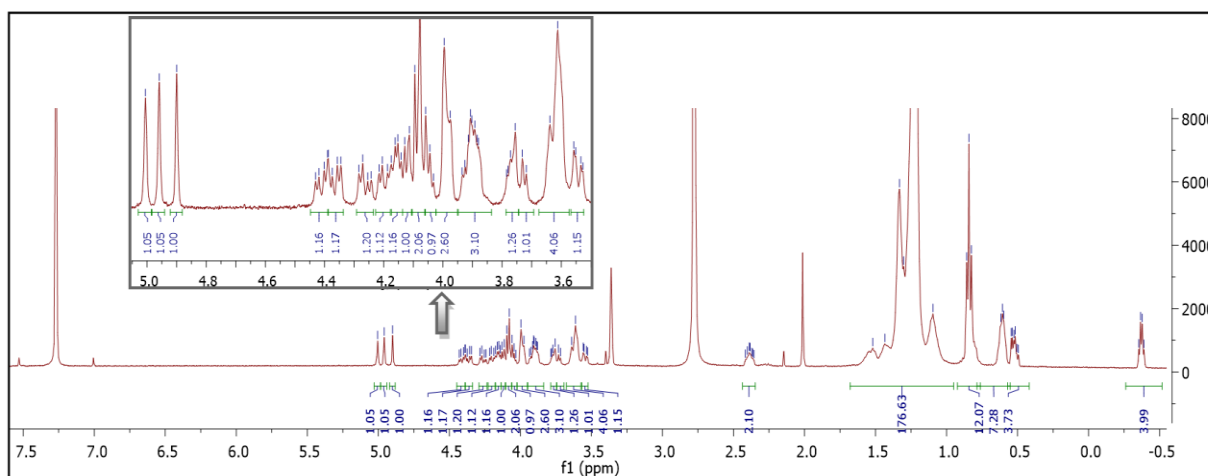

Figure S14:  $^1\text{H-NMR}$  spectrum for compound (**15b** ( $\text{R}' = \text{H}$ )).

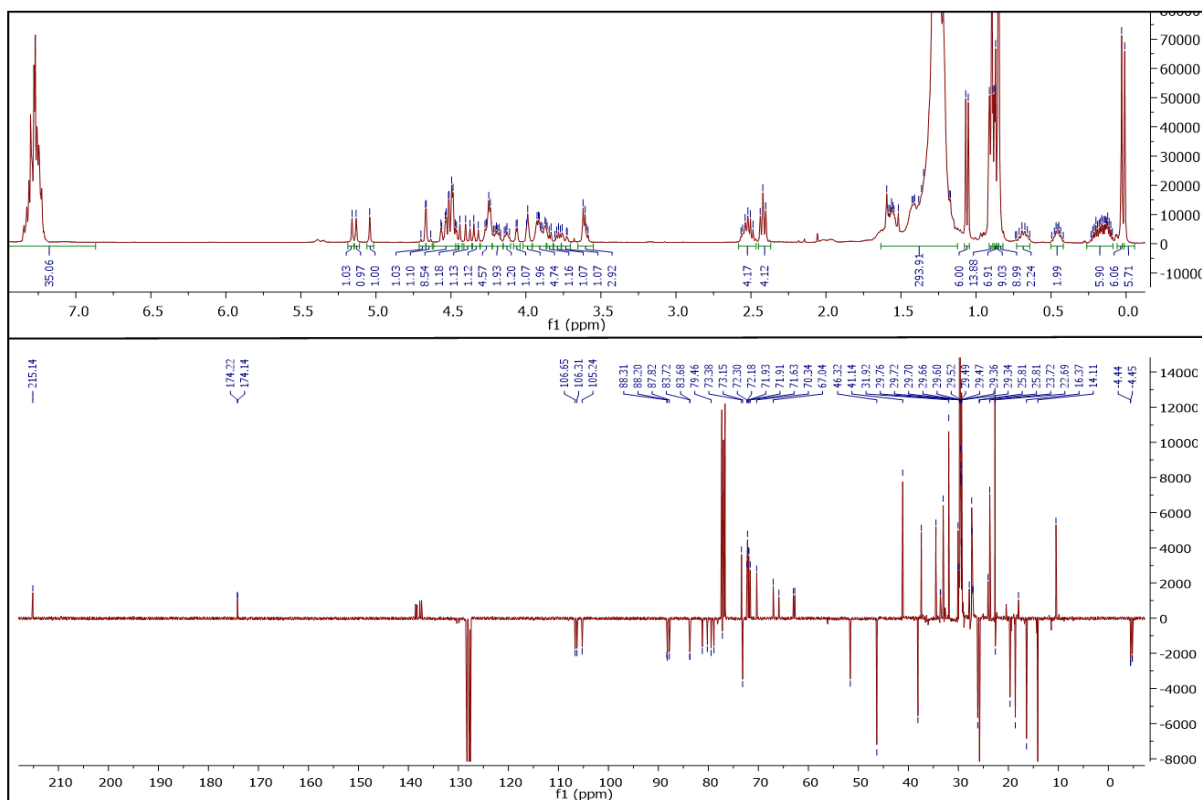

Figure S15:  $^1\text{H}$  and  $^{13}\text{C}$ -NMR spectra for compound (**13c** ( $\text{R}' = \text{TBDMS}$ )).

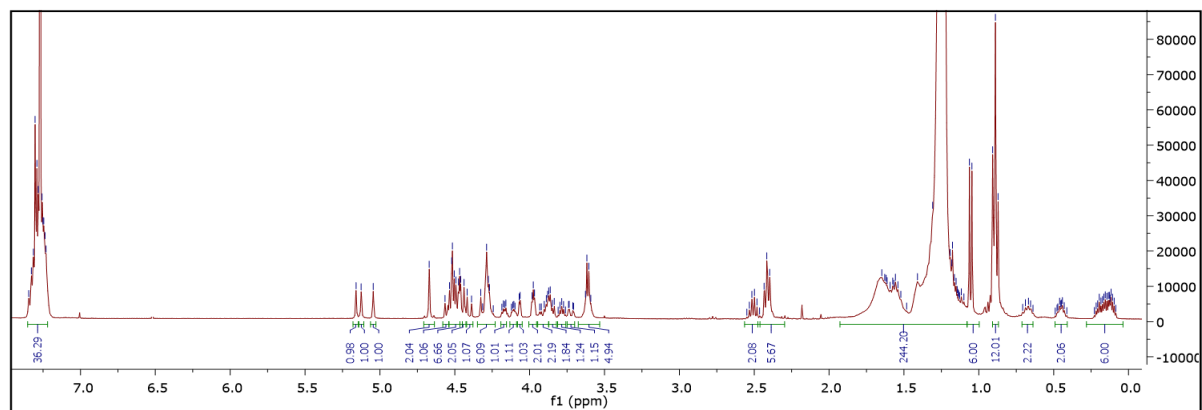

Figure S16:  $^1\text{H}$ -NMR spectrum for compound (**14c** ( $\text{R}' = \text{H}$ )).

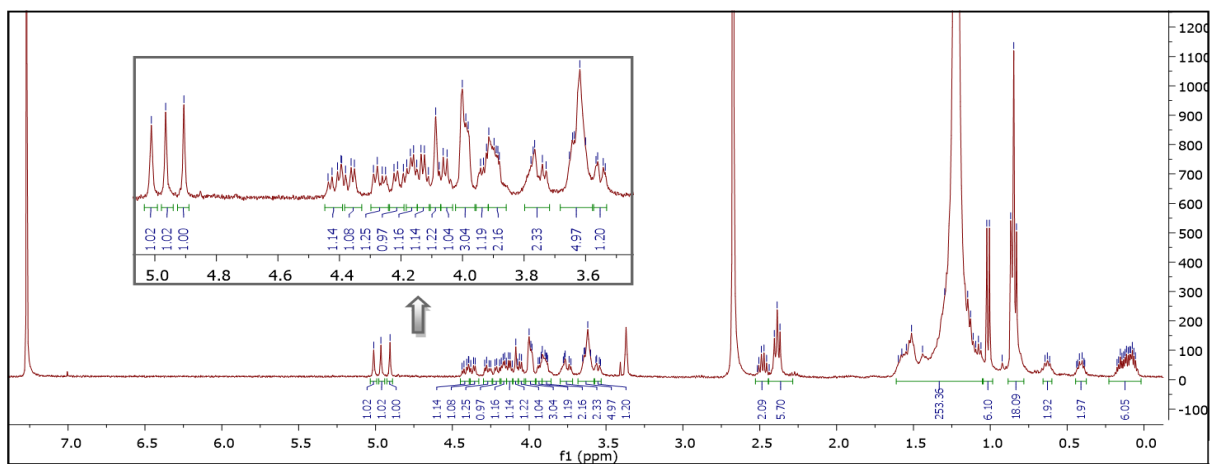

Figure S17: <sup>1</sup>H-NMR spectrum for compound (15c (R' = H)).
